# Supplementary material for: Wissenstranslation am Beispiel Bewegungsförderung von älteren Menschen: Wie gelangen wissenschaftliche Erkenntnisse in die kommunale Praxis?
Source: Springer Nature journal article supplement (doi:10.1007/s00103-021-03311-2), 2021-04-09
Supplement: MOESM1 [file 19075422]

## **Wissenstranslation am Beispiel Bewegungsförderung von älteren Menschen: Wie gelangen wissenschaftliche Erkenntnisse in die kommunale Praxis?**

Annalena Bußkamp<sup>1</sup>, Claudia Vonstein<sup>1</sup>, Judith Tillmann<sup>1</sup>, Christin Roßmann<sup>1</sup>, Freia De Bock<sup>2</sup>

<sup>1</sup> Bundeszentrale für gesundheitliche Aufklärung (BZgA), Referat 2-22, Köln, Deutschland

<sup>2</sup> Bundeszentrale für gesundheitliche Aufklärung (BZgA), Abteilung 2, Köln, Deutschland

### **Korrespondierende Autorin:**

Annalena Bußkamp

Referat 2-22 „Zusammenarbeit mit Ländern, Krankenkassen und Verbänden, Gremien; Gesundes Alter; Frauengesundheit; Männergesundheit“

Bundeszentrale für gesundheitliche Aufklärung

Maarweg 149-161

50825 Köln

Deutschland

annalena.busskamp@bzga.de

Inhalt:

**-Tabelle Z1: Auszug aus dem Kodierbaum**

**-Beschreibung der Datenanalyse**

**Tabelle Z1: Auszug aus Kodierbaum**

Im Rahmen der Auswertung der Interviews wurde auf Basis von theoretischen Vorüberlegungen ein Kategoriensystem entworfen. Ein Auszug aus diesem System mit den für den Artikel relevanten Kategorien, Subkategorien und Dimensionen ist im Folgenden dargestellt:

| <b>Kategorie</b>               | <b>Subkategorie</b>        | <b>Dimension</b>                     |
|--------------------------------|----------------------------|--------------------------------------|
| Informationsbeschaffung        | Rahmenbedingungen          | Informationsüberfluss                |
|                                |                            | Ressourcen                           |
|                                |                            | Akteursvielfalt                      |
|                                | Zugang                     | Person                               |
|                                |                            | Internet                             |
|                                |                            | Newsletter                           |
|                                |                            | Fachzeitschrift                      |
|                                | Netzwerk                   |                                      |
| Wissenschaftliche Erkenntnisse | Nutzen                     | Argumentationshilfe                  |
|                                |                            | Umsetzungshilfe                      |
|                                |                            | Zusatzinformation                    |
|                                | Barrieren                  | Komplexität                          |
|                                |                            | Statistik                            |
|                                |                            | Ressourcen                           |
|                                |                            | Zugänglichkeit                       |
|                                |                            | Fachsprache                          |
|                                |                            | Nicht vorhanden                      |
|                                | Einbezug in Entscheidungen | Politischer Rückhalt                 |
|                                |                            | Akteurskompetenz                     |
|                                |                            | Komplexität                          |
|                                | Strukturelle Aufbereitung  | Suchmaske                            |
|                                |                            | Länge                                |
|                                |                            | Zusammenfassung                      |
|                                | Inhaltliche Aufbereitung   | Übertragbarkeit                      |
|                                |                            | Setting und Rahmenbedingungen        |
|                                |                            | Ergebnis                             |
|                                |                            | Kosten                               |
|                                |                            | Beispiele                            |
|                                |                            | Statistik                            |
|                                |                            | Handlungsempfehlungen                |
|                                |                            | Förderliche und hinderliche Faktoren |
| Bereitstellung                 | Newsletter                 |                                      |
|                                | Veranstaltung              |                                      |
|                                | Beratung                   |                                      |
|                                | Fachzeitschrift            |                                      |

## **Beschreibung der Datenanalyse**

Die qualitative Inhaltsanalyse enthält fünf zentrale Schritte: Theoretische Vorüberlegungen, Vorbereitung der Extraktion, Extraktion, Aufbereitung und Auswertung. Im Zuge der Interviewauswertung nach Gläser und Laudel [22] wurde demnach auf Basis des theoretischen Hintergrundes ein Kategoriensystem (Suchraster) entworfen. Anhand dessen wurden Informationen, die für die Beantwortung der Forschungsfragen relevant sind, aus dem Interviewmaterial extrahiert und inhaltlich strukturiert. Die dabei entstehende Informationsbasis wurde durch die Anpassung der Kategorien an die Besonderheiten des Materials geformt. Diese Extraktion aller relevanten Daten aus den Interviews und Reflexionsbögen kann als erster Interpretationsschritt gesehen werden. Anschließend wurde das extrahierte Material aufbereitet, d. h. geprüft, nach zeitlichen oder sachlichen Aspekten sortiert und zusammengefasst. Daraufhin wurde das Material ausgewertet und analysiert.

In einem ersten Schritt wurden folglich zehn Interviews von zwei Autorinnen unabhängig auf Übereinstimmung mit den theoretisch festgelegten Kategorien untersucht und Textbestandteile dementsprechend zugeordnet. Aussagen, die nicht in das Kategoriensystem passten, wurden umformuliert und abstrahiert. Durch Selektion, Zusammenfassung und Gruppierung wurden diese Abschnitte auf die Kerninhalte reduziert, um damit weitere Subkategorien induktiv zu entwickeln. Die Vorgänge liefen aufgrund der Datenmenge simultan ab. Daraufhin erfolgte ein zweiter Durchgang der Analyse. Bei diesem wurden alle Experteninterviews anhand des erweiterten Auswertungsrasters erneut untersucht und um zusätzliche induktiv erarbeitete Kategorien ergänzt. Es erfolgten eine abschließende Überarbeitung und Überprüfung des Kategoriensystems (siehe Tabelle Z1).
